# Supplementary material for: Hampered motility promotes the evolution of wrinkly phenotype in Bacillus subtilis
Source: PubMed Central journal article supplement (PMC6192195; doi:10.1186/s12862-018-1266-2), 2018-10-16

**WT**

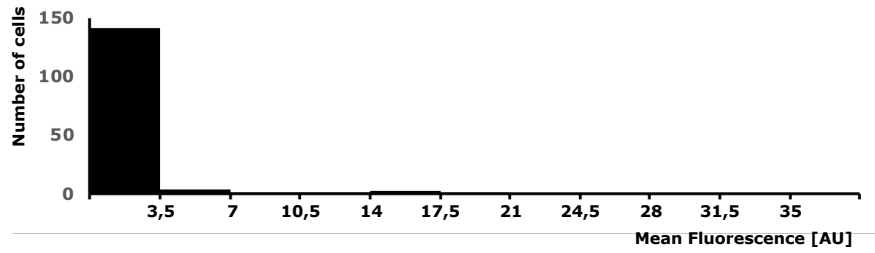

**$\Delta$ hag**

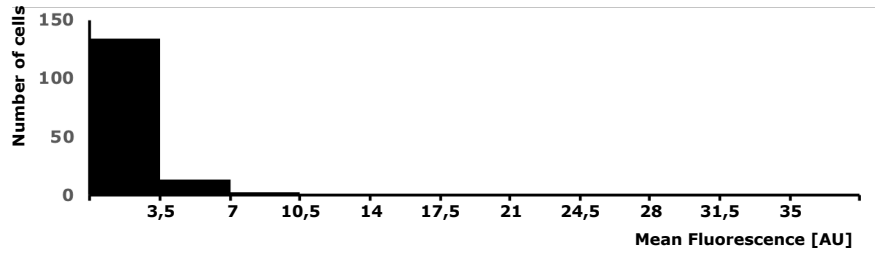

**$\Delta$ sinR**

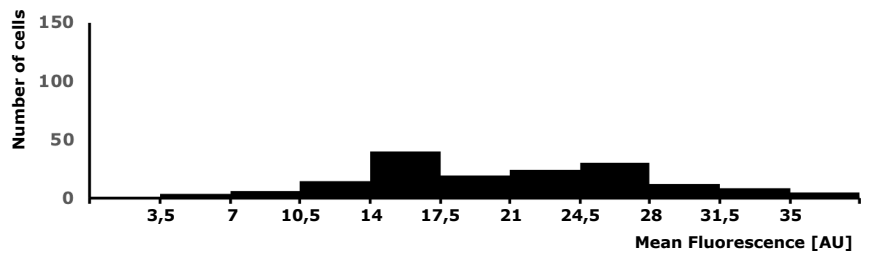

**WTWS1**

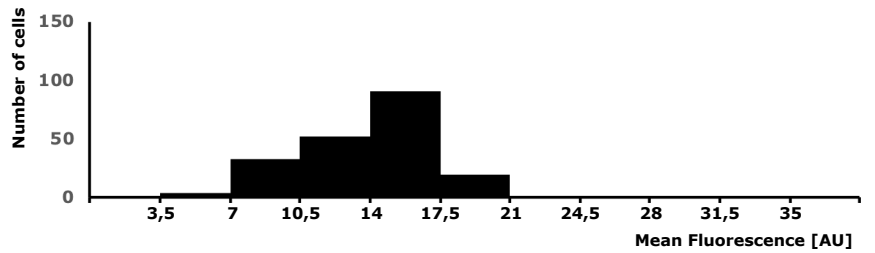

**WTWS8**

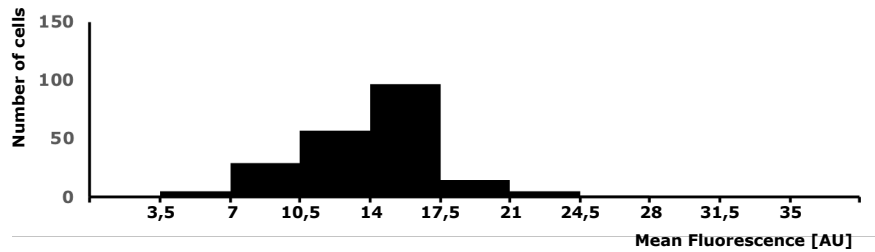

**$\Delta$ hagWS2**

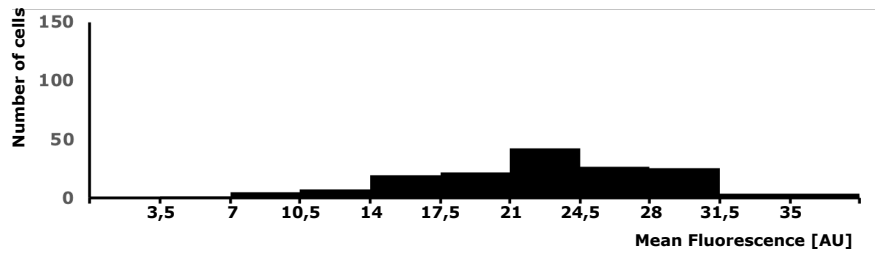

**$\Delta$ hagWS9**

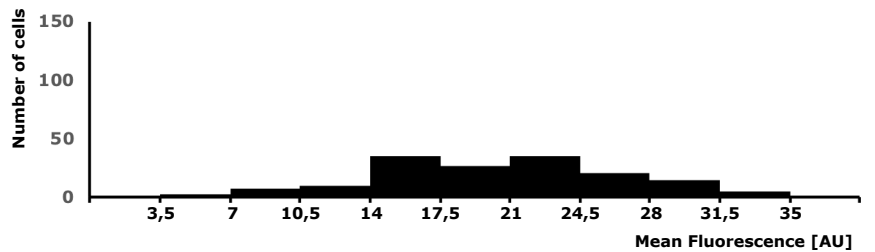

Supplement: 12862_2018_1266_MOESM3_ESM.pdf [file 12862_2018_1266_MOESM3_ESM.pdf]
