# Supplementary material for: Hampered motility promotes the evolution of wrinkly phenotype in Bacillus subtilis
Source: PubMed Central journal article supplement (PMC6192195; doi:10.1186/s12862-018-1266-2), 2018-10-16

WT

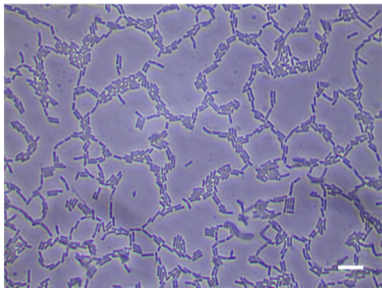

$P_{\text{hyperspank}}\text{-sinI}^{\text{full}}$

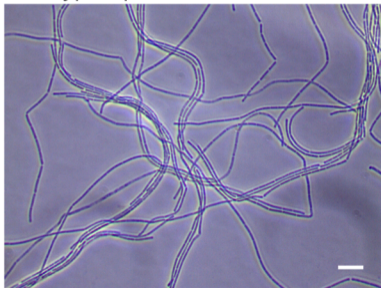

$P_{\text{hyperspank}}\text{-sinI}^{9-39}$

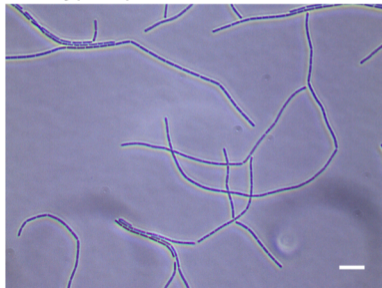

Supplement: 12862_2018_1266_MOESM4_ESM.pdf [file 12862_2018_1266_MOESM4_ESM.pdf]
